# Supplementary material
Source: Springer Nature journal article supplement (https://www.springermedizin.de/resource/supplementary/12879_2009_894_MOESM5_ESM.pdf/9449584)

# No. new cases / 100 000

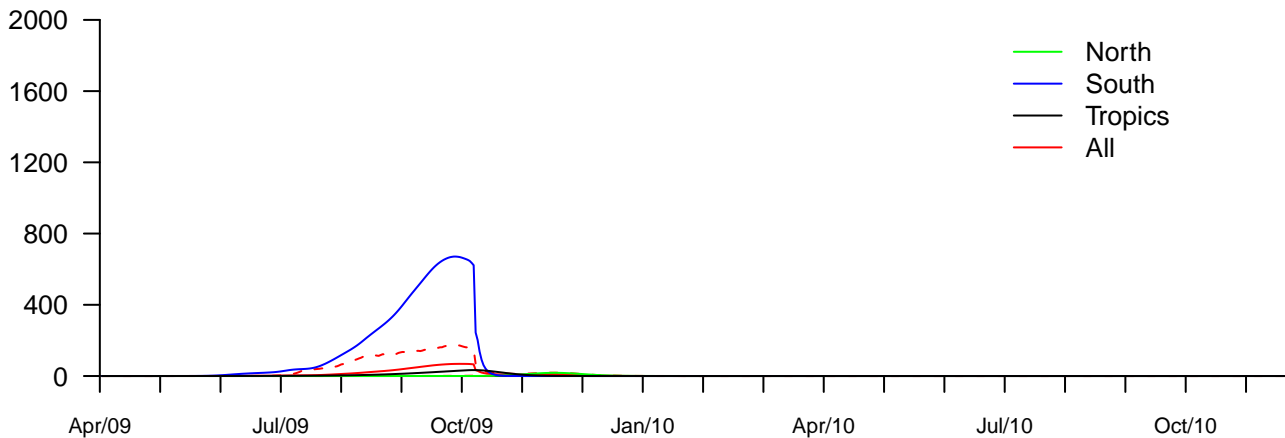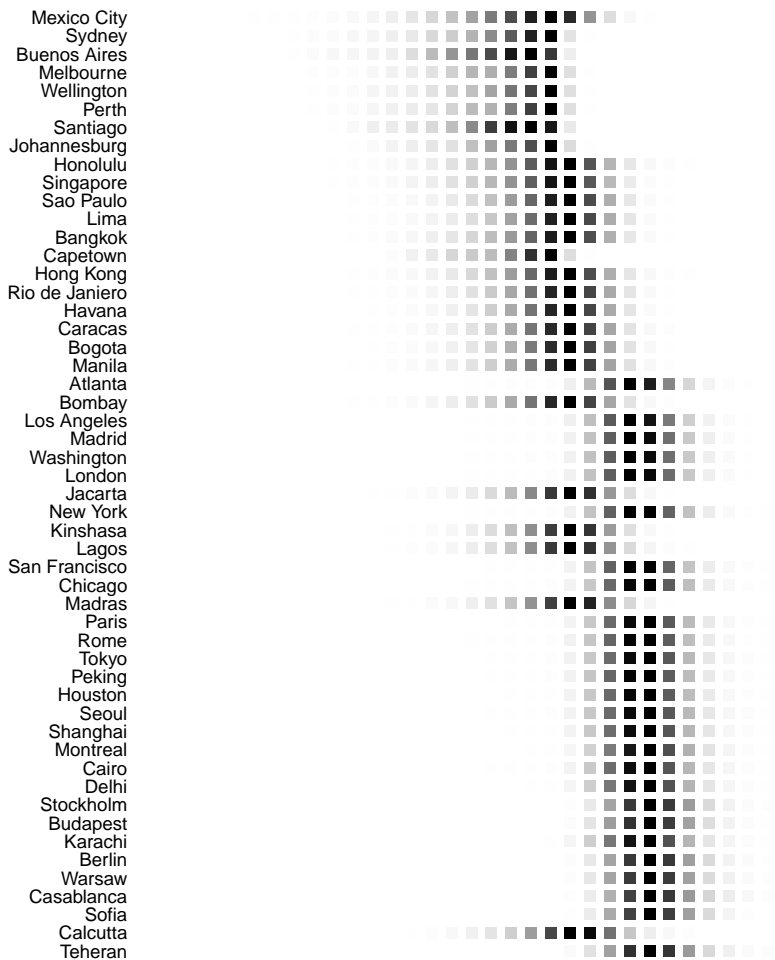

Supplement: MOESM5 [file 9449584]
